# Heterologous Expression and Maturation of an NADP-Dependent [NiFe]-Hydrogenase: A Key Enzyme in Biofuel Production

Junsong Sun<sup>‡</sup>, Robert C. Hopkins<sup>‡</sup>, Francis E. Jenney, Jr.<sup>‡</sup>, Patrick M. McTernan, Michael W. W. Adams\*

Department of Biochemistry and Molecular Biology, University of Georgia, Athens, Georgia, United States of America

## Abstract

Hydrogen gas is a major biofuel and is metabolized by a wide range of microorganisms. Microbial hydrogen production is catalyzed by hydrogenase, an extremely complex, air-sensitive enzyme that utilizes a binuclear nickel-iron [NiFe] catalytic site. Production and engineering of recombinant [NiFe]-hydrogenases in a genetically-tractable organism, as with metalloprotein complexes in general, has met with limited success due to the elaborate maturation process that is required, primarily in the absence of oxygen, to assemble the catalytic center and functional enzyme. We report here the successful production in *Escherichia coli* of the recombinant form of a cytoplasmic, NADP-dependent hydrogenase from *Pyrococcus furiosus*, an anaerobic hyperthermophile. This was achieved using novel expression vectors for the co-expression of thirteen *P. furiosus* genes (four structural genes encoding the hydrogenase and nine encoding maturation proteins). Remarkably, the native *E. coli* maturation machinery will also generate a functional hydrogenase when provided with only the genes encoding the hydrogenase subunits and a single protease from *P. furiosus*. Another novel feature is that their expression was induced by anaerobic conditions, whereby *E. coli* was grown aerobically and production of recombinant hydrogenase was achieved by simply changing the gas feed from air to an inert gas (N<sub>2</sub>). The recombinant enzyme was purified and shown to be functionally similar to the native enzyme purified from *P. furiosus*. The methodology to generate this key hydrogen-producing enzyme has dramatic implications for the production of hydrogen and NADPH as vehicles for energy storage and transport, for engineering hydrogenase to optimize production and catalysis, as well as for the general production of complex, oxygen-sensitive metalloproteins.

**Citation:** Sun J, Hopkins RC, Jenney FE Jr, McTernan PM, Adams MWW (2010) Heterologous Expression and Maturation of an NADP-Dependent [NiFe]-Hydrogenase: A Key Enzyme in Biofuel Production. PLoS ONE 5(5): e10526. doi:10.1371/journal.pone.0010526

**Editor:** Fernando Rodrigues-Lima, University Paris Diderot-Paris 7, France

**Received:** January 23, 2010; **Accepted:** April 2, 2010; **Published:** May 6, 2010

**Copyright:** © 2010 Sun et al. This is an open-access article distributed under the terms of the Creative Commons Attribution License, which permits unrestricted use, distribution, and reproduction in any medium, provided the original author and source are credited.

**Funding:** This research was supported by a grant (DE-FG02-05ER15710) from the Chemical Sciences, Geosciences and Biosciences Division, Office of Basic Energy Sciences, Office of Science, U.S. Department of Energy. The funders had no role in study design, data collection and analysis, decision to publish, or preparation of the manuscript.

**Competing Interests:** The authors have declared that no competing interests exist.

\* E-mail: adams@bmb.uga.edu

‡ Current address: Georgia Campus - Philadelphia College of Osteopathic Medicine, Suwanee, Georgia, United States of America

‡ These authors contributed equally to this work.

## Introduction

From the human economic perspective, molecular hydrogen (H<sub>2</sub>) is an ideal form of transportable energy. It is superior to current forms such as gasoline as it is less toxic, safer to use, and has an approximately three-fold higher energy yield per kilogram [1]. A number of problems must be surmounted before a 'hydrogen economy' is a reality, however, including the economic production and transportation of H<sub>2</sub> [2,3]. At present H<sub>2</sub> is generated from fossil fuels by steam reforming processes and by electrolysis of water using electricity typically produced from fossil fuels [1–3]. Biological H<sub>2</sub> production is an attractive, and renewable, alternative for human needs. The gas is generated by microorganisms from all three domains of life, and for some, H<sub>2</sub> provides an excellent source of low potential reducing power (H<sub>2</sub>/H<sup>+</sup>, E<sub>o</sub>' = -420mV) for growth and biosynthesis [4,5]. Microorganisms have evolved elegant and efficient mechanisms for H<sub>2</sub> metabolism. All are based on the enzyme hydrogenase, which catalyzes the reversible reduction of protons (Eqn. 1):

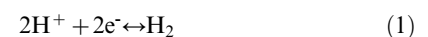

Many microorganisms obtain energy by metabolically coupling H<sub>2</sub> oxidation to a variety of terminal electron acceptors such as fumarate, sulfate, carbon dioxide, and oxygen [4,6]. The production of H<sub>2</sub> is typical of organisms occupying anaerobic environments and is used as a means of disposing of excess reductant from oxidative metabolism.

Hydrogenases catalyze H<sub>2</sub> production using a binuclear metal center active site consisting of either [NiFe] or [FeFe] [6,7]. The [FeFe]-hydrogenases usually have high catalytic rates but are extremely sensitive to irreversible inactivation by oxygen, much more so than the [NiFe]-enzymes [4]. In contrast to [FeFe]-hydrogenases, which are limited to certain bacteria and a few unicellular eukaryotes, [NiFe]-hydrogenases are widespread in both bacteria and archaea. Although these two classes of hydrogenase are not phylogenetically related, the geometry of

their catalytic sites is highly similar [7], and both contain the unusual biological ligands carbon monoxide (CO) and cyanide (CN) which serve to modulate their electronic structure and facilitate catalysis [8].

All [NiFe]-hydrogenases are comprised of at least two subunits, one of which (the large subunit, or LSU) contains the [NiFe] catalytic site, while the other (the small subunit, or SSU) contains three iron-sulfur (FeS) clusters. These clusters transfer electrons from an external electron donor to the [NiFe] active site in the LSU for reduction of protons. The assembly of the [NiFe] site and maturation of the enzyme requires the concerted reactions of multiple gene products. The facultative anaerobe *E. coli* contains three membrane-bound hydrogenases, and elegant studies by Böck and coworkers have shown that the assembly of one of them (HYD3) requires the participation of eight accessory proteins (encoded by *hypA-hypF*, *hycI*, and *slyD*, Fig. 1a) [9]. The final step of hydrogenase maturation requires a specific protease (HycI) that removes a peptide of  $\leq 20$  residues from the C-terminal of the LSU, allowing the protein to fold around the [NiFe] active site [12]. In contrast, it appears that only three maturation proteins are required for the production of a functional [FeFe]-hydrogenase [13].

In the present study we demonstrate for the first time the heterologous expression in a genetically-tractable organism (*E. coli*) of a functional [NiFe]-hydrogenase enzyme, that from a model

hyperthermophilic microorganism, *Pyrococcus furiosus* (*Pf*), which grows optimally at 100°C [14]. Previous attempts to heterologously produce [NiFe]-hydrogenases have involved related host organisms and/or have met with limited success. For example, *Desulfovibrio gigas* hydrogenase produced in *D. fructosovorans* exhibited only low activity [15], and transfer of the entire H<sub>2</sub> uptake (*hup*) gene cluster (~18 kb) from *Rhizobium leguminosarum* led to functional expression in only some closely-related species [16]. A functional, NAD-dependent [NiFe] hydrogenase from a gram-positive organism, *Rhodococcus opacus*, was produced in the gram-negative *Ralstonia eutropha* [17], and the membrane bound hydrogenase of *Ralstonia eutropha* was produced in *Pseudomonas stutzeri* using a broad-host-range plasmid containing the *hyp* genes and a regulatory hydrogenase-histidine kinase system [18]. This H<sub>2</sub>-sensing, regulatory hydrogenase of *R. eutropha* has also been heterologously produced in *E. coli* but this does not require the proteolytic processing involved in maturation of the [NiFe]-hydrogenase enzymes [19]. While previous attempts to heterologously produce a recombinant [NiFe]-hydrogenase in *E. coli* have been unsuccessful [20,21], our system employs a novel set of compatible vectors modified with an anaerobically-induced *E. coli* hydrogenase promoter, P<sub>hya</sub>, and minimally requires a single processing gene from *Pf*. It therefore appears that the *E. coli* processing enzymes can assemble functional (and soluble) [NiFe]-hydrogenase enzyme from phylogenetically distant organisms,

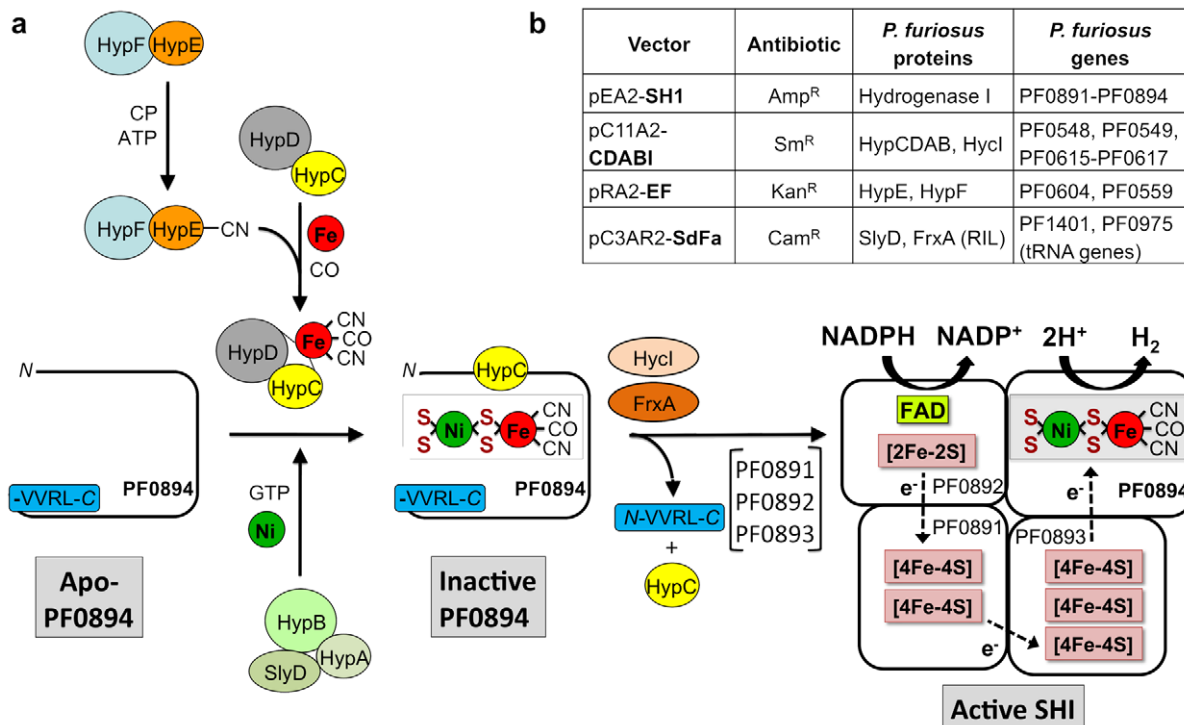

**Figure 1. Synthesis of *P. furiosus* soluble hydrogenase I (SHI) and the plasmid constructs used for recombinant production.** (a) Maturation pathway for the [NiFe] catalytic site of *P. furiosus* SHI is based on that proposed for *E. coli* hydrogenase 3 [10]. HypE and HypF generate thiocyanate in an ATP-dependent process from carbamoyl phosphate (CP). The source of the CO ligand is unknown. The HypCD complex binds the iron atom containing the CN and CO ligands and donates it to the catalytic subunit (PF0894). The Ni atom is provided by the HypAB-SlyD complex in a GTP-dependent reaction. The Ni and Fe atoms in the [NiFe] site are coordinated to PF0894 by the S atoms of four of its Cys residues (indicated by S). Activation of PF0894 requires cleavage of four C-terminal residues (-VVRL) catalyzed by a newly identified peptidase, FrxA (and to a much lesser extent by HycI). It is not known how the biosynthesis of PF0894 is coordinated with that of the other three subunits (PF0891, PF0892 and PF0893) to give catalytically-active SHI. The predicted cofactor content of mature heterotetrameric SHI [11] is shown together with their roles in the reversible production of hydrogen gas from NADPH. The abbreviations used are: CP, carbamoyl phosphate; CO, carbonyl ligand; CN, cyano ligand; FAD, flavin adenine dinucleotide. (b) The expression plasmids utilized for production of SHI in *E. coli* strain MW4W. The antibiotics refer to the selective marker on each plasmid: Amp, Ampicillin; Sm, Streptomycin; Kan, Kanamycin; Cam, Chloramphenicol.  
doi:10.1371/journal.pone.0010526.g001

even from a completely different domain of life, including those growing at extreme temperatures.

*Pf* grows by fermenting carbohydrates to organic acids, CO<sub>2</sub> and H<sub>2</sub> [14]. It contains three [NiFe]-hydrogenases; two are cytoplasmic enzymes consisting of four subunits, and the third is a membrane-bound hydrogenase (MBH) of fourteen subunits. The two cytoplasmic enzymes, termed soluble hydrogenase I (SHI) and hydrogenase II (SHII), utilize NADP(H) as the physiological electron carrier [22]. MBH accepts electrons from reduced ferredoxin (Fd<sub>red</sub>) and is the enzyme responsible for evolving hydrogen during growth, while SHI and SHII are thought to be involved in the recycling of hydrogen produced by MBH [23]. Herein we demonstrate heterologous production of functional *Pf*SHI.

## Results

*Pf* SHI is encoded by four genes (PF0891-0894) in a single operon, with the catalytic LSU encoded by PF0894 and SSU encoded by PF0893 [22]. One of the additional subunits is predicted to contain two FeS clusters (PF0891) while the other (PF0892) is predicted to contain another FeS cluster and flavin adenine dinucleotide (FAD), and to interact with NAD(P)(H). SHI purified from *P. furiosus* biomass is extremely stable at high temperatures ( $t_{1/2}$  for loss of activity ~2 hours at 100°C) and in the presence of oxygen ( $t_{1/2}$  ~6 hours at 23°C in air) [11].

The four structural genes encoding *Pf* SHI (PF0891-PF0894) were coexpressed in *E. coli* under anaerobic conditions with eight processing genes identified in the *Pf* genome (*hypCDABEF*, *hycI* and *slyD*), based on sequence similarity to the processing genes identified in *E. coli*. These include PF0617, which is the homolog of the *E. coli* peptidase (HycI) involved in C-terminal processing of one of its three hydrogenases, termed HYD3. However, the C-terminal region of *Pf*SHI is more similar to the catalytic subunit of another *E. coli* hydrogenase, HYD2, rather than to HYD3, and HYD2 is processed by another protease (HybD) [24]. A search of the *Pf* genome revealed a gene (PF0975), annotated as ferredoxin oxidoreductase A (*fixA*), which shows 47% sequence similarity to *E. coli* HybD. This was included as the ninth *Pf* gene to be coexpressed in *E. coli* under anaerobic conditions.

A series of four compatible vectors based on the DUET vector system (Novagen) had been modified previously to contain GATEWAY<sup>TM</sup> recombination sites (Invitrogen) [25], which allows coexpression of as many as eight separate genes or operons under the control of T7 promoters. This cloning approach also inserts 19 amino acids (GSITSLYKKAGSENYFQGG, ~2.0 kDa) at the N-terminus of the first gene of the operon in each plasmid. Since the standard T7 promoter does not function in *E. coli* under anaerobic conditions, four different promoters were investigated for anaerobic heterologous expression of the *Pf* genes in *E. coli*. Three were native *E. coli* hydrogenase promoters that are anaerobically-induced (*hya*, *hyb*, and *hyc*, [26-28]), while the fourth (*hyp*, [29]) induces expression of *E. coli* hydrogenase-processing genes. Expression of the *lacZ* gene by these four promoters (Fig. 2) and several of the *Pf hyd* genes, including *hypCDAB* and *hycI*, were examined using RT-PCR (data not shown). The *hya* promoter (P<sub>hya</sub>) was induced by anaerobiosis and gave the highest level of expression. The T7 promoters on all expression vectors were therefore replaced with P<sub>hya</sub> (Fig. 3). One vector (pDEST-C3A) was further modified to include the rRNA genes from plasmid pRIL (Stratagene), which is typically required for efficient expression of *Pf* genes in *E. coli* due to differing codon usage, creating the plasmid pC3A-RIL. The complete list of expression vectors used in this study is given in Table 1.

To facilitate detection of heterologously-produced *Pf* SHI, all four vectors (Fig. 1b) were co-transformed into an *E. coli* strain MW1001 lacking the catalytic subunits of its own hydrogenases (*AhyaB AhybC AhycE*) [32]. Strain MW1001 produces no H<sub>2</sub> during anaerobic growth, and cell extracts have no detectable hydrogenase activity at either 37 or 80°C (using the standard assay of methyl viologen (MV)-linked H<sub>2</sub> evolution *vide infra*). However, cell-free extracts of anaerobically-grown *E. coli* MW1001 containing the four vectors encoding *Pf* SHI and the *Pf* hydrogenase processing genes did show hydrogenase activity at 80°C (Fig. 4a), which must therefore arise from recombinant *Pf* hydrogenase I.

In order to determine the minimum number of *Pf* genes needed for assembly of an active form of SHI in *E. coli*, different *Pf* accessory genes and plasmids were omitted from the complete heterologous expression system (Fig. 4a and Fig. 5). The results show that maximal recombinant production of functional SHI, as measured by the specific activity in the cell-free extract at 80°C, requires, in addition to the structural genes (PF0891-PF0894), coexpression of only the plasmid containing *fixA* (PF0975) (Fig. 4a). FrxA is, therefore, the protease required to process SHI by removing the four C-terminal -VVRL residues (Fig. 1a). Low activity was detected if HycI was present, but there was no activity if both proteases were absent, showing that *E. coli* proteases cannot process SHI. The *E. coli* processing enzymes HypABCD and HypEF appear to assemble a functional SHI whose catalytic subunit (PF0894) lacks C-terminal processing. This was confirmed both *in vivo* (Fig. 5) and using an *in vitro* assay (Fig. 4b) where extracts from *E. coli* cells expressing either only the four structural genes for SHI or only *fixA* were mixed and SHI activity was measured after incubation at 80°C. As expected, much lower SHI activity was obtained if *hycI* replaced *fixA*. Surprisingly, unprocessed SHI (where PF0894 lacks C-terminal cleavage) appears to be stable in *E. coli*, which will be of great utility to those interested in studying the mechanism of assembly of the [NiFe] site. The minimal expression system in *E. coli* therefore contains five *Pf* genes encoding only SHI and FrxA.

Recombinant *Pf*SHI (rSHI) was purified from *E. coli* strain MW4W (Fig. 6a, Table 2) to a final specific activity of 100 U mg<sup>-1</sup>, which is comparable to that of the native enzyme purified from *P. furiosus* biomass (Fig. 6b). The hydrogenase was obtained as a homogeneous protein of MW ~150,000 Da (based on size-exclusion chromatography, data not shown), also similar to that of the native enzyme, and contained the four different protein subunits (Fig. 6a) [11]. Comparison of the properties of the recombinant and native enzymes (Fig. 6b) demonstrate that rSHI is similar in specific activity, affinity for NADPH (apparent K<sub>m</sub>), stability upon oxygen exposure, and metal content. The only significant difference is the lower stability of rSHI at 90°C. This was not due to the additional N-terminal residues (~2 kDa) on one of the subunits (PF0891, due to the Gateway cloning strategy) since the properties of the wild-type form of rSHI, obtained by recloning PF0891-PF0894 to include only the wild-type amino acid sequence (pET-A-SHI, Fig. 7), and that of Gateway-tagged rSHI were virtually identical (data not shown).

## Discussion

The ability of recombinant *Pf*SHI to accept electrons from the physiological electron carrier NADPH[22] is of some significance since this requires a properly processed, mature, and folded enzyme containing the FAD- (PF0892) and the FeS-containing (PF0891 and PF0892) subunits, in addition to catalytic LSU (PF0894) and SSU (PF0893). In contrast, electrons from the low

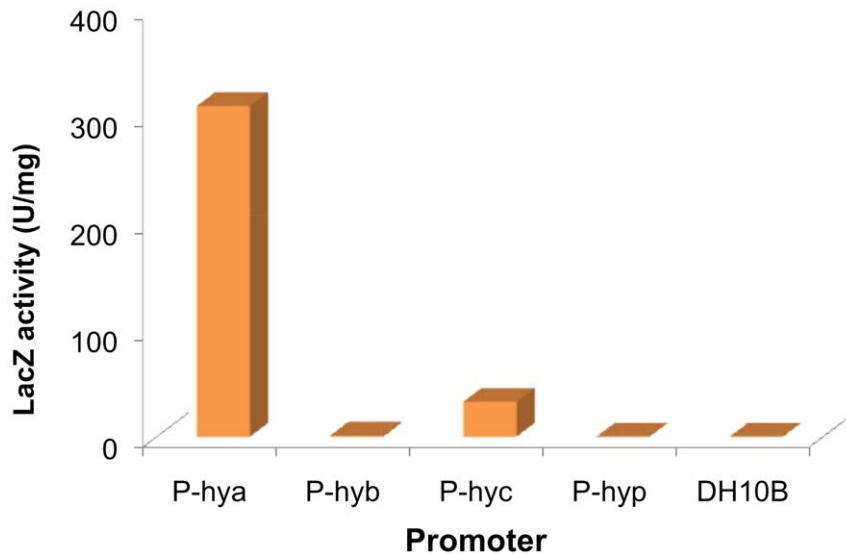

**Figure 2. Analysis of *E. coli* promoters with a *lacZ* gene fragment  $\beta$ -galactosidase reporter assay.** Plasmids were transformed into DH10B. The specific activity of *lacZ* was measured by a modified Miller [30] assay calculated as  $200(OD_{420-t1}-OD_{420-t2}) \text{ min}^{-1} \text{ mg}^{-1}$ , where t1 and t2 are the start and end time points, respectively. doi:10.1371/journal.pone.0010526.g002

potential artificial electron donor MV, which was used in all of the routine assays of hydrogenase activity, can theoretically be donated to any of the FeS clusters in the enzyme. The results (Fig. 6b) demonstrate that rSHI can accept electrons from NADPH as efficiently as the native enzyme, indicating that it is functionally folded and contains all cofactors.

Like other hydrogenases, *Pf* SHI is much more active with an artificial redox dye (methyl viologen) than with its physiological electron carrier ([34], see Figure 6), nevertheless, the specific activity of  $H_2$  production from NADPH by *Pf* SHI is more than 6-fold higher than that reported for an NADH-dependent hydrogenase [34]. While the recombinant form of SHI is as

**a**  $P_{hya}$  promoter with Gateway attB1/TEV sequence:

```
CTCGAATTCCTTCTCTTTTACTCGTTTAGCAACCGGCTAAACATCCCCACCGC
CCGGCCAAAAGAAAAATAGGTCCATTTTTATCGCTAAAAGATAAATCCACACA
GTTTGTATTGTTTTGTGCAAAGTTTCACTACGCTTTATTAACAATACTTTCTG
GCGACGTGCGCCAGTGCAGAAGGATGAGCTTTCGTTTTTCAGCATCTCACGT
GAAGCGATGGTTTGCCTTGCTACAGGGACGTCGCTTGCCGACCATAAGCGC
CCGGTGTCTCGCCGGTGTGCAAGGAGGAGACGTGC
```

**start codon** Gateway Tag + TEV site: GSITSLYKKAGSENYFQGG  
 GAT**ATG**GGTGGGGCTCGATCACAAGTTTGTACAAAAAAGCAGGCTCAGAAA  
 ACCTGTATTTTCAGGGAGGA

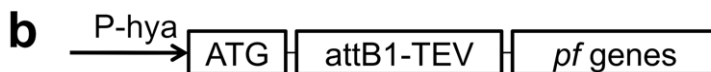

GSITSLYKKAGSENYFQGG

**c**  
 ORF1.....TAA**gaggtggaaa**ATG.....ORF2

**Figure 3. Plasmid construction for rSHI production in *E. coli*.**  $P_{hya}$  was cloned into a set of patented plasmids constructed by inserting Invitrogen Gateway cassettes into Novagen Duet plasmids [25]. **(a)** Sequences of *E. coli* anaerobic promoter  $P_{hya}$ , attB1 and TEV protease recognition site sequence and their encoded peptide sequence [31]. **(b)** Elements constructed in the final expression plasmids:  $P_{hya}$  promoter, N-terminus of the first protein in the operon derived from the Gateway recombination cloning site (attB1) including a TEV protease site [31] and *P. furiosus* genes. **(c)** Artificial Shine-Dalgarno sequences inserted between *P. furiosus* fused ORFs in plasmids pC11A2-CDAB1, pC3AR2-5dFa and pRA2-EF. doi:10.1371/journal.pone.0010526.g003

**Table 1.** Strains and plasmids used in this study.

| Strains and plasmids                          | Genotype                                                                                                                                                                                                                                                                                    | Source     |
|-----------------------------------------------|---------------------------------------------------------------------------------------------------------------------------------------------------------------------------------------------------------------------------------------------------------------------------------------------|------------|
| <b>Strains</b>                                |                                                                                                                                                                                                                                                                                             |            |
| <i>E. coli</i> MW1001                         | <i>lacI</i> <sup>q</sup> <i>rrnB</i> <sub>T14</sub> $\Delta$ <i>lacZ</i> <sub>WJ16</sub> <i>hsdR514</i> $\Delta$ <i>araBAD</i> <sub>AH33</sub> $\Delta$ <i>rhaBAD</i> <sub>LD78</sub> $\Delta$ <i>hyaB</i> $\Delta$ <i>hybC</i> $\Delta$ <i>hycE</i>                                        | 32         |
| <i>E. coli</i> DH10B                          | <i>F</i> <sup>-</sup> <i>endA1</i> <i>recA1</i> <i>galE15</i> <i>galk16</i> <i>nupG</i> <i>rpsL</i> $\Delta$ <i>lacX74</i> $\Phi$ 80 <i>lacZ</i> $\Delta$ <i>M15</i> <i>araD139</i> $\Delta$ ( <i>ara,leu</i> )7697 <i>mcrA</i> $\Delta$ ( <i>mrr-hsdRMS-mcrBC</i> ) $\lambda$ <sup>-</sup> | Invitrogen |
| <i>E. coli</i> MW4W                           | MW1001 strain with plasmids:<br>pC11A2-CDABI/pC3AR2-SF/pRA2-EF/pEA2-SH1                                                                                                                                                                                                                     | This study |
| <b>Plasmids</b>                               |                                                                                                                                                                                                                                                                                             |            |
| <b>a. lacZ reporter plasmids</b>              |                                                                                                                                                                                                                                                                                             |            |
| pSB2019                                       | Amp <sup>R</sup> P <sub>xyIA</sub> -GFP                                                                                                                                                                                                                                                     | 33         |
| pLXA                                          | Amp <sup>R</sup> P <sub>hya</sub> -lacZ                                                                                                                                                                                                                                                     | This study |
| pLXB                                          | Amp <sup>R</sup> P <sub>hyb</sub> -lacZ                                                                                                                                                                                                                                                     | This study |
| pLXC                                          | Amp <sup>R</sup> P <sub>hyc</sub> -lacZ                                                                                                                                                                                                                                                     | This study |
| pLXP                                          | Amp <sup>R</sup> P <sub>hyp</sub> -lacZ                                                                                                                                                                                                                                                     | This study |
| <b>b. Destination and Expression plasmids</b> |                                                                                                                                                                                                                                                                                             |            |
| pDEST-C1                                      | Cloning vector, Sm <sup>R</sup>                                                                                                                                                                                                                                                             | 25         |
| pDEST-C11A2                                   | Cloning vector, Sm <sup>R</sup>                                                                                                                                                                                                                                                             | This study |
| pC11A2-CDABI                                  | Expression vector, Sm <sup>R</sup>                                                                                                                                                                                                                                                          | This study |
| pDEST-C3                                      | Cloning vector, Cm <sup>R</sup>                                                                                                                                                                                                                                                             | 25         |
| pDEST-C3A                                     | Cloning vector, Cm <sup>R</sup>                                                                                                                                                                                                                                                             | This study |
| pRIL                                          | Express tRNA <i>argU/ileY/leuW</i> , Cm <sup>R</sup>                                                                                                                                                                                                                                        | Stratagene |
| pC3A-RIL*                                     | Cloning vector, Cm <sup>R</sup>                                                                                                                                                                                                                                                             | This study |
| pC3AR2-slyD*                                  | Expression vector, Cm <sup>R</sup>                                                                                                                                                                                                                                                          | This study |
| pC3AR2-SdFa*                                  | Expression vector, Cm <sup>R</sup>                                                                                                                                                                                                                                                          | This study |
| pET-CAG2                                      | Cloning vector, Amp <sup>R</sup>                                                                                                                                                                                                                                                            | This study |
| pEA2-SH1                                      | Expression vector, Amp <sup>R</sup>                                                                                                                                                                                                                                                         | This study |
| pET-A-SH1                                     | Expression vector, Amp <sup>R</sup>                                                                                                                                                                                                                                                         | This study |
| pRSFDuet-1                                    | Cloning vector, Kan <sup>R</sup>                                                                                                                                                                                                                                                            | Novagen    |
| pRSF-CAG2                                     | Cloning vector, Kan <sup>R</sup>                                                                                                                                                                                                                                                            | This study |
| pRA2-EF                                       | Expression vector, Kan <sup>R</sup>                                                                                                                                                                                                                                                         | This study |

\*Contain tRNA genes *argU/ileY/leuW*.

doi:10.1371/journal.pone.0010526.t001

active as the native enzyme at 80°C, it is not as thermostable (Figure 6). Interestingly, the native enzyme gives rise after SDS-electrophoresis to a protein band of ~80 kDa, in addition to the four subunits. This band retains hydrogenase activity and is thought to represent a highly stable SDS-resistant residual form of the holoenzyme ([11], and Lane 1 of Figure 6). The lack of this additional band in the recombinant preparations (Figure 6) suggests that assembly of the recombinant hydrogenase is not completely correct, even though its catalytic activity indicates that it is functionally assembled. It is possible that holoenzyme assembly to the native-like form of SHI represents a kinetic problem, as speculated with other recombinant hydrogenases [15], since all known *Pf* accessory genes are present in the recombinant host.

The availability of a system to produce rSHI provides a ready supply of the enzyme as well as the opportunity to generate mutant forms with desired characteristics. For example, it was recently demonstrated that a combination of NADPH-utilizing *Pf* SHI, obtained from native *Pf* biomass, with enzymes of the pentose phosphate pathway and starch phosphorylase, evolved H<sub>2</sub> *in vitro* from starch with surprisingly high efficiency and yield [35].

Similarly, attempts have been made to link hydrogenase to the low potential reductant generated by photosynthesis, thereby constructing a light-driven H<sub>2</sub>-production system [36,37]. A major problem is the generation of oxygen by photolysis of water, which inhibits the oxygen-sensitive hydrogenase. A functional expression system for hydrogenase provides the tools needed to engineer a hydrogenase enzyme resistant to O<sub>2</sub> inactivation, as well for optimizing output of H<sub>2</sub>. Directed evolution techniques can now be utilized to generate [NiFe]-hydrogenases with tailored catalytic activity, oxygen sensitivity, and potentially even changing coenzyme specificity. There are also broader implications for heterologous production of complex, heteromeric metalloproteins. If *E. coli* does not possess homologs of the required accessory genes for any candidate metalloprotein complex, coexpression of multiple genes involved in multiprotein complex assembly is now possible even under anaerobic conditions, and even for complex metalloproteins from extremophiles. While expression of stable hyperthermophilic proteins in *E. coli* is well-documented (e.g., see [38]), it is surprising that at least some of them, such as the *Pf* protease, are functional at 37°C, in this case to efficiently process *Pf* SHI in *E. coli*. The ability to heterologously produce and



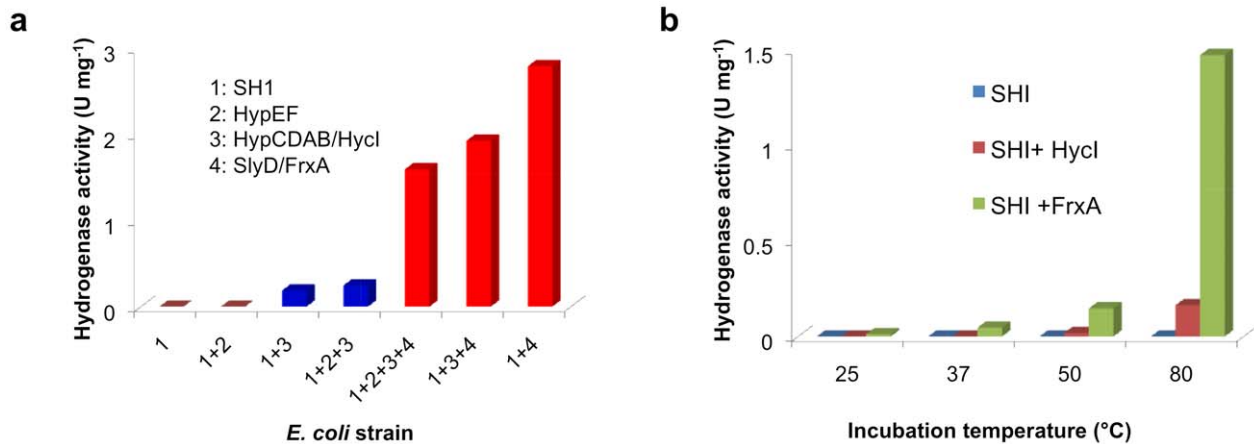

**Figure 4. Accessory proteins required for maturation of recombinant *P. furiosus* SHI *in vivo* and *in vitro*.** (a) Recombinant SHI (rSHI) was expressed in the presence of different *Pf* processing genes and the resulting *E. coli* cell-extracts were assayed at 80°C. The bars indicate methyl viologen-linked specific activity expressed as U mg<sup>-1</sup> or μmol H<sub>2</sub> evolved min<sup>-1</sup> mg<sup>-1</sup>. FrxA but not SlyD is necessary to produce high amounts of active hydrogenase. (b) Processing of rSHI in cell-free extracts of *E. coli* by FrxA and Hycl of *P. furiosus*. An *E. coli* cell-extract containing rSHI (PF0891-0894) as the only expressed *Pf* genes, was added to another cell-extract containing only either FrxA or Hycl as the only expressed *Pf* genes. The mixtures were incubated for 30 min at the indicated temperature and the specific activity was determined at 80°C by the methyl viologen-linked assay.

doi:10.1371/journal.pone.0010526.g004

engineer a soluble hydrogenase, particularly one as thermostable and as relatively oxygen-insensitive as *Pf* SHI, makes this enzyme an excellent model system for future basic and also applied studies (e.g., [39]).

## Methods

### Strains and growth conditions

*Escherichia coli* strain MW1001 (*lacF<sup>rrnB</sup><sub>T14</sub>AlacZ<sup>WJ16</sup>hsdR514AaraBAD<sub>AH33</sub>ArhaBAD<sub>LD78</sub>AhyaBAhybCAhycE*) [32] was a gener-

ous gift from Dr. Thomas K. Wood (Department of Civil and Environmental Engineering, Texas A & M University). *E. coli* strains were routinely grown in 2X YT [40] medium containing Ampicillin 50 μg/mL, Chloramphenicol 20 μg/mL, Streptomycin 25 μg/mL, Kanamycin 25 μg/mL, supplemented with 1 mM MgSO<sub>4</sub>. For anaerobic expression, an overnight culture was used to inoculate (1% vol/vol) 1 L of medium in a 2.8 L baffled Fernbach flask, and the culture was grown at 37°C shaking at 150 rpm under N<sub>2</sub> for 3–5 hours to an OD<sub>600nm</sub> ~0.8. Cultures were then decanted into 1 L bottles and 100 μM

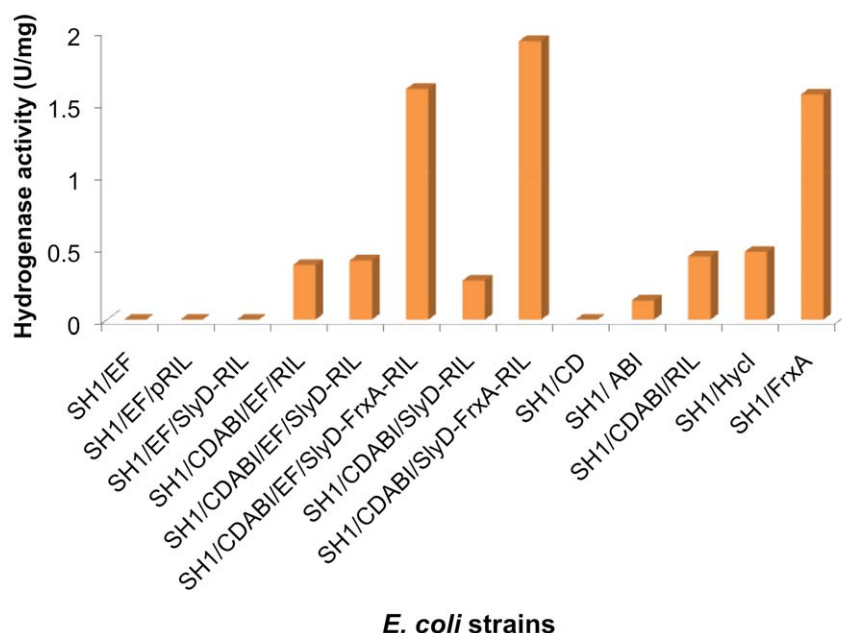

**Figure 5. Analysis of the *P. furiosus* maturation proteins required to produce active rSHI in *E. coli*.** The specific activities are shown for rSHI in cell extracts of *E. coli* resulting from the co-expression of different *Pf* processing genes in *E. coli* MW1001. Bars indicate MV-linked specific activity (μmol H<sub>2</sub> evolved min<sup>-1</sup> mg<sup>-1</sup>). All cell extracts were heated for 30 min at 80°C prior to assay.

doi:10.1371/journal.pone.0010526.g005

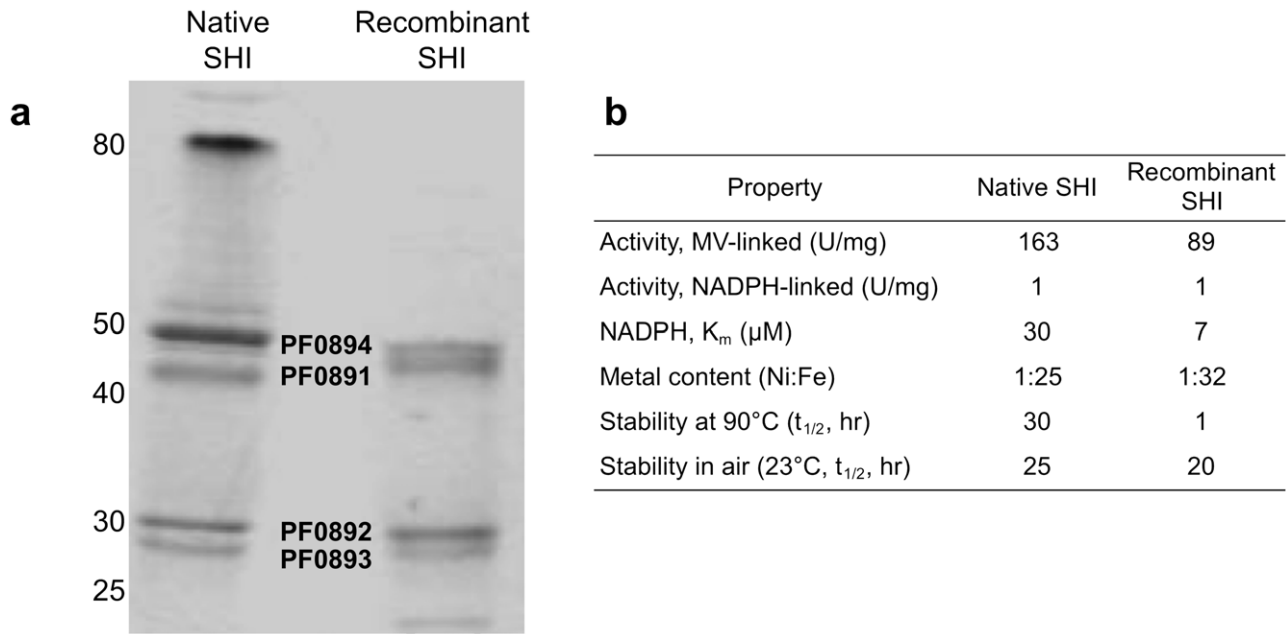

**Figure 6. Properties of recombinant *P. furiosus* SHI.** (a) Gel electrophoresis (SDS-PAGE) analysis of native and recombinant SHI. Bands representing the four subunits of the SHI are indicated, all of which were confirmed by MALDI-TOF analysis (data not shown). The high molecular weight band in the native protein, not seen in the recombinant version, represents undenatured tetrameric protein [11]. Recombinant PF0891 is approximately 2 kDa larger than the native protein due to the N-terminal extension (see Fig. 3). Molecular weight markers (kDa) are indicated. (b) Physical and catalytic properties of rSHI and the native hydrogenase purified from *P. furiosus* biomass. Hydrogen evolution was measured using either methyl viologen (MV) or NADPH as the electron donor at 80°C. doi:10.1371/journal.pone.0010526.g006

$\text{FeCl}_3$ , 25  $\mu\text{M}$   $\text{NiSO}_4$  and 56 mM glucose were added. The bottles were sealed with 43 mm Straight Plug stoppers (Wheaton, Millville, NJ) under  $\text{N}_2$ , and incubated at 37°C with shaking at 120 rpm for 12–16 hours. For larger scale fermentations (15 L), cultures were grown aerobically as described above and were decanted into a carboy (20 L) and sealed under  $\text{N}_2$ . The culture was allowed to grow anaerobically to induce expression and maturation of the recombinant hydrogenase for 14 hours. Cells were harvested by centrifugation at 10,000  $\times g$  for 5 min. The cell pellets were flash frozen in liquid nitrogen and stored at  $-80^\circ\text{C}$  before use. Molecular biology techniques were performed as described [40], and unless otherwise indicated, chemicals were obtained from Sigma-Aldrich (St. Louis, MO). All molecular biology reagents were utilized following the manufacturer's protocols and were obtained from New England Biolabs (Ipswich, MA), except for Pfu DNA polymerase (Stratagene, La Jolla, CA) and the reagents for GATEWAY<sup>TM</sup> recombination (Invitrogen, Carlsbad, CA).

#### Purification of recombinant *P. furiosus* SHI

All purification steps were performed under strictly anaerobic conditions. Frozen cell pellets were resuspended in Buffer A (50 mM Tris, 2 mM sodium dithionite (J.T. Baker, Phillipsburg, NJ), pH 8.0) containing 0.5 mg/mL lysozyme (Sigma) and 50  $\mu\text{g}/\text{mL}$  deoxyribonuclease I (Sigma) in a ratio of 3 mL/g wet weight cells. The resuspended cells were incubated with stirring at room temperature under an atmosphere of argon for one hour and sonicated on ice with a Branson Sonifer 450 for 30 minutes (output 6.0, 50% duty cycle). Cell lysates were heated to 80°C for 30 minutes, cooled to room temperature, and centrifuged (Beckman L90K ultra centrifuge 45Ti rotor at 100,000  $\times g$  for 1 hr). The supernatant was collected and loaded onto a DEAE anion exchange column (66 mL; GE Healthcare, Piscataway, NJ) equilibrated in Buffer A. The column was washed with 5 volumes of Buffer A and the proteins were eluted with a gradient of 0 to 500 mM NaCl in Buffer A over 20 column volumes and collected in 25 ml fractions in an anaerobic chamber. Fractions containing

**Table 2.** Purification of recombinant *P. furiosus* SHI from *E. coli*.

| Step              | Units ( $\mu\text{mol min}^{-1}$ ) | Protein (mg) | Specific Activity<br>(Units $\text{mg}^{-1}$ ) | Yield (%) | Purification (-fold) |
|-------------------|------------------------------------|--------------|------------------------------------------------|-----------|----------------------|
| Cell Extract (CE) | 1183                               | 37260        | 0.03                                           | 100       | 1                    |
| Heat Treated CE   | 1287                               | 2381         | 0.5                                            | 109       | 17                   |
| DEAE Sepharose    | 789                                | 573          | 1                                              | 67        | 43                   |
| Phenyl Sepharose  | 237                                | 45           | 5                                              | 20        | 166                  |
| Superdex S-200    | 80                                 | 0.8          | 100                                            | 7         | 3150                 |

doi:10.1371/journal.pone.0010526.t002

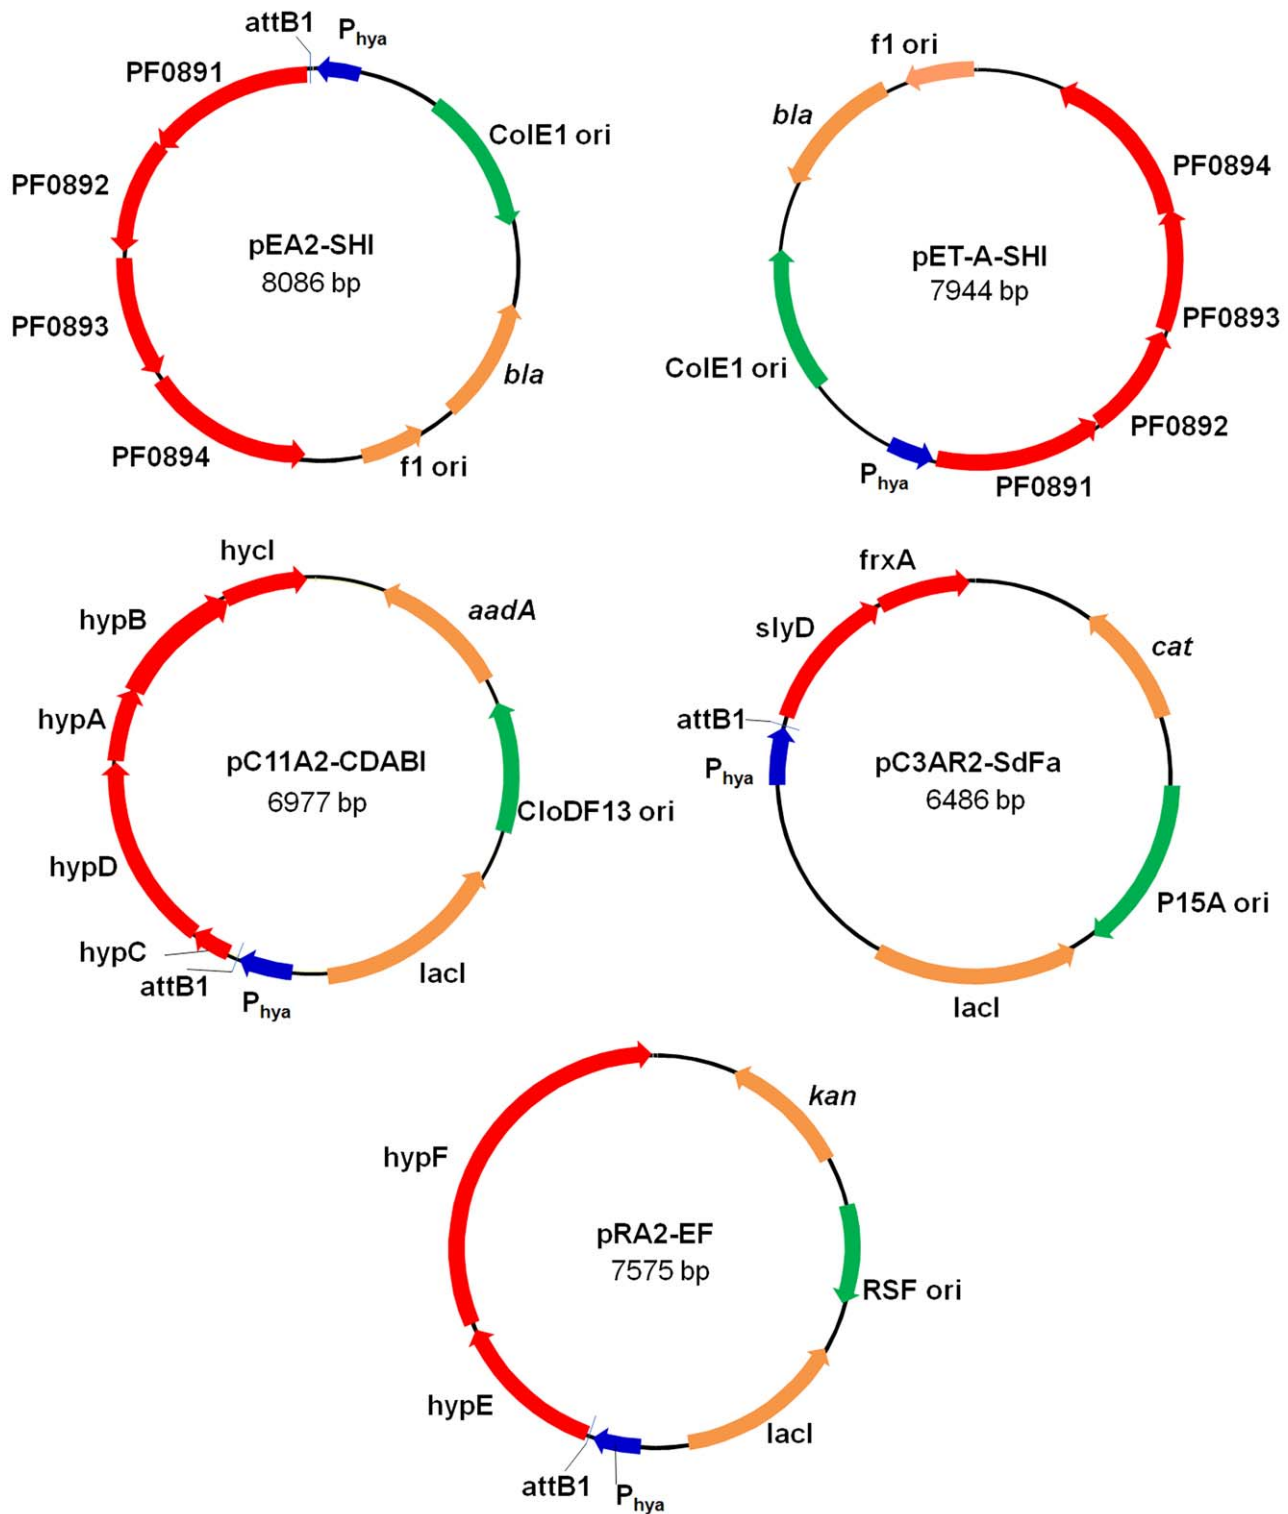

**Figure 7. Maps of expression plasmids.** Plasmid pEA2-SHI and pET-A-SHI were used to express rSHI in *E. coli*, and pET-A-SHI was used to generate SHI with a Gateway sequence and TEV recognition site attached to the N-terminal of PF0891 subunit. The plasmid pC11A2-CDABI contains the operons *hypCD* and *hypAB*, *hycl* from *P. furiosus*. The operons *hypCD* and *hypAB*, *hycl* of *P. furiosus* were linked by an intergenic region shown in Figure 3c. The Gateway sequence is located at the N-terminus of the HypC protein. The plasmid pC3AR2-SdFa has *slyD* and *frxA* of *P. furiosus* cloned behind  $P_{hya}$ , the recombinant SlyD has the N-terminal Gateway sequence/TEV site. Plasmid pRA2-EF was constructed to co-express HypE/HypF, the same linker as in the plasmid pC11A2-CDABI or pC3AR2-SdFa, is inserted between *hypE* and *hypF* gene, and HypE contains the N-terminal Gateway sequence.

doi:10.1371/journal.pone.0010526.g007



hydrogenase activity were pooled and Buffer A containing 2.0 M ammonium sulfate was added to a final concentration of 0.8 M. The sample was then loaded on to a column of Phenyl Sepharose (45 ml; GE Healthcare) equilibrated in Buffer C (Buffer A containing 0.8M (NH<sub>4</sub>)<sub>2</sub>SO<sub>4</sub>). The column was washed with 5 volumes of Buffer C and eluted with a 20 column volume gradient from 0.8-0 M (NH<sub>4</sub>)<sub>2</sub>SO<sub>4</sub> in Buffer A collected in 20 ml fractions. Fractions containing hydrogenase activity were combined and concentrated anaerobically by ultrafiltration (PM-30 kDa MWCO membrane, Millipore, Billerica, MA), and applied to a gel filtration column (Superdex S-200 26/60 GE Healthcare) equilibrated with Buffer D (Buffer A containing 300 mM NaCl) and eluted anaerobically in 2 mL fractions over 1.5 column volumes. Native *P. furiosus* SHI was isolated as previously described [41]. The results of the procedure are summarized in Table 2.

### Hydrogenase assays

Hydrogen production by *E. coli* cultures was routinely measured by removing 100 µl from the culture headspace with a gas-tight syringe (Hamilton Co, Reno, NV) and injecting into a Shimadzu GC8 gas chromatograph equipped with a washed molesieve 5A 80/100 (6'×1/8"×0.085") column. Hydrogenase activity was routinely determined by H<sub>2</sub> evolution from methyl viologen (1 mM) reduced by sodium dithionite (10 mM) at 80°C as described previously [41], except the buffer was 100 mM EPPS, pH 8.4. For the physiologically-relevant hydrogen evolution assay, methyl viologen and sodium dithionite were replaced by NADPH (1 mM). One unit of hydrogenase specific activity is defined as 1 µmole of H<sub>2</sub> evolved min<sup>-1</sup> mg<sup>-1</sup>. Oxygen sensitivity assays were performed by exposing samples to air at 25°C. Thermal stability assays were measured by anaerobic incubation of the hydrogenase samples (0.06 mg/ml in 100 mM EPPS buffer, pH 8.4, containing 2 mM sodium dithionite) at 90°C. Residual enzyme activities were measured using the MV-linked H<sub>2</sub>-evolution assay.

### Construction of lacZ reporter anaerobic expression plasmids

Four *E. coli* anaerobic promoters, P<sub>hya</sub>, P<sub>hyb</sub>, P<sub>hyc</sub> and P<sub>hyp</sub> (Fig. 2) were inserted into the plasmid pLX1 between *EcoRI* and *XmaI* sites to construct plasmids pLXA, pLXB, pLXC and pLXP. pLX1 was constructed from plasmid pSB2019 [33] by replacing a green fluorescent protein gene between *XmaI* and *SalI* with the N-terminal sequence of lacZ. Plasmids containing lacZ under control of these promoters were transformed into *E. coli* DH10B cells. β-galactosidase activity in extracts of anaerobically-grown cells was analyzed (Spectra MAX 190 96 well microplate reader) using a modified Miller assay [30]. The specific activity of β-galactosidase is expressed as units per mg of total protein in the cell-free extract.

### Construction of anaerobic expression vectors

A series of four vectors were constructed by Horanyi et al. [25] in which the GATEWAY™ recombination cassette from Invitrogen was combined with the four compatible expression vectors of the Novagen (EMD Chemicals, San Diego, CA) DUET vector system (Table 1). The four original DUET vectors, as well as the four GATEWAY-modified versions (pDEST-C3A, pDEST-C11A, pRSF-ACG, and pET-ACG), were further modified to replace the native T7 promoter, which is not functional under anaerobic growth conditions [42]. The *hya* promoter [43] (see Fig. 3) was amplified from genomic DNA purified from the *E. coli* strain MG1655 using the primers (JS1 5'-CTCGAATTCTTCTCTTTTACTCGTTTAG, JS2 5'-CACCCATATCGCA-

CGTCTCTCCTCC). The PCR product was then treated with T4 polynucleotide kinase, and ligated to plasmid pDEST-C3 digested with *EcoI* to create pDEST-C3A; the entire cassette containing P<sub>hya</sub> and Gateway cloning sites was amplified with primers (JS1 and JS3 5'-GCCGCAAGCTTAGCAGCCGGAT, the cassette was digested with *EcoRI* and *HindIII*, then ligated with the similarly digested plasmids (pCDFDuet1, pRSFDuet1 and pET23) to create pDEST-C11A, pRSF-ACG and pET-ACG respectively. A 813 bp DNA fragment containing three tRNA genes from plasmid pRIL [44] was amplified using the primers JS4 (5'-CGCGGATCCGTCACCCCTGGATGCTGTAC) and JS5 (5'-AAGTACGAGCTCAGGTCGCAGACGTTTTGCA), and cloned into pDEST-C3A between *BamHI* and *SacI* to create the plasmid pC3A-RIL (Table 1).

### Cloning of the *P. furiosus* genes encoding SHI and the hydrogenase maturation proteins

The *P. furiosus* SHI structural genes (PF0891-PF0894) were amplified using purified *P. furiosus* genomic DNA (DSM 3638, Genbank accession number AE009950) as the template. The entire four-gene operon was amplified with the primers (PF0891-attB1-TEV: 5'-GGGGACAAGTTTGTACAAAAAAGCAGGCTCAGAAAAACCTGTATTTTCAGGGAGGATGCTATGTTAAGTTACCCAAGG and PF0894-attB2-TEV: 5'-GGGGAC-CACCTTTGTACAAGAAAGCTGGGTCTCCTCCCTGAAAA-TACAGGTTTTCTAAAGTCTAACACGCTGGACTGAG). The 4164 bp PCR product was crossed into the GATEWAY entry vector pDONR/Zeo using the manufacturer's protocol, resulting in the entry vector pDONR-SHI, and subsequently used to cross into the modified GATEWAY expression vector pET-SHI. The plasmid pET-A-SHI was constructed to produce "tagless" recombinant *P. furiosus* SHI. P<sub>hya</sub> without the downstream GATEWAY tag was amplified with primer pair Pa-SacF (CTCGAATTCTCTCTTTTACTCGTTTAG) and Pa-HindR (TGAGGAAGCTTATCGATGGTACCGCGGCATGCATATGGCACGTCTCTCCTCCTTGCG), the pET-A plasmid was made by inserting the *HindIII/EcoRI* digested PCR product into the similarly treated pETDuet-1(Novagen). The tagless Pf SHI gene was amplified with primer pair 0891-NdeF (GATAGGTTCCATATGAGGTATGTTAAGTTACCCAAGGA) and 0894-KpnR (ATAGGGTACCTTAAAGTCTAAC-CACGTGGACTGAGC), the *NdeI/KpnI* digested PCR product was inserted into similarly treated pET-A to produce pET-A-SHI. To make the expression vector pC11A-CDABI, the *Pf hypCD* operon (PF0548-PF0549) was first amplified with primers PF0548-attB1-TEV (5'-GGGGACAAGTTTGTACAAAAAAGCAGGCTCAGAAAAACCTGTATTTTCAGGGAGGATGCCTTGCAATCCCAGGGAAAG) and CD-ABI-R (5'-CTTACTATTGCATCTGCCAACGCCCATTTCTGTCATTTTCCACCTCC-TACATCAGGGCGCCATATTTGTAAA). This 1460 bp *hypCD* PCR product was used as the forward primer to join and amplify the *hypABI* operon (PF0615 – PF0617) creating the artificial *hypCDABI* operon with the reverse primer PF0617-attB2-TEV (5'-GGGGACCACCTTTGTACAAGAAAGCTGGGTCTCCTCCTGAAAATACAGGTTTTCTTAAGAAAGCTCAAGACTTTCATAA). A fused *hypEF* operon (PF0604 and PF0559) was obtained with the same strategy by PCR that employed the primer PF0604-attB1-TEV (5'-GGGGACAAGTTTGTACAAAAAAGCAGGCTCAGAAAAACCTGTATTTTCAGGGAGGAGAA-GAACTAATTAGGGAGGTAA and the primer EF-fusion (5'-GTGAATTCTATAAGCTTTTCATTTCTCTCCCCAGATACATTTTCCACCTCCTAACAACTCTAGGAACGGGAT-CAC). The resulting 1025 bp PCR product of PF0604 was used as the forward primer along with the reverse primer PF0559-attB2-

TEV (5'-GGGGACCACTTTGTACAAGAAAGCTGGGTCT-CCTCCCTGAAAATACAGGTTTTTCTACATCAGGCGC-CATATTTGTAA) to generate the 3428 bp artificial *hypEF* operon. The fused *P.furiosus* *shyD* (PF1401) and *frxA* (PF0975) genes were cloned by the same PCR method with the primers PF1401-attB1-TEV (5'-GGGGACAAGTTTGTACAAAAAAG-CAGGCTCAGAAAACCTGTATTTTCAGGGAGGAAAA-GTAGAGAAAGGAGATGTCA), the fusion primer SlyD-FrxA-F (5'-GAGGAGAGTGAGTCTAAAGCGGAAGAATCT-TAAGAGGTGAAAAGTGAGTAACTTTTTAACTTTTCAC-TT) and the reverse primer frx-attB2 (5'-GGGGACCACTTTG-TACAAGAAAGCTGGGTCTCCCTATTACTCA). It was not possible to transform all four plasmids simultaneously into *E. coli* strains, so routinely one plasmid was transformed, and competent cells made from these cells to transform the next plasmid, and this process repeated as needed.

### Metal and Proteomic Analyses

Nickel and iron were measured using a quadrupole-based ICP-MS (7500ce, Agilent Technologies, Tokyo, Japan), equipped with a MicroMist Nebulizer (Agilent Technologies). Proteins were separated using native- or SDS-PAGE gradient gel electrophoresis (4–20% Criterion gels; Biorad, Hercules, CA) and stained with Coomassie Brilliant Blue. Gel bands of interest were cut out, processed and digested for 16 h at 37°C according to the manufacturer's protocol provided with the recombinant porcine trypsin used for the in-gel protein digest (Roche Applied Science,

Indianapolis, IN). The peptides were purified with C-18 reversed-phase NuTip® cartridges according to the manufacturer's instructions (Glygen Corp., Columbia, MD). Approximately 1 µL of purified peptides and 1 µL of ProteoMass Peptide & Protein MALDI-MS Calibration Kit standard (Sigma) were spotted onto a MTP 384 Massive MALDI target (Bruker Daltonics, Billerica, MA). The target was analyzed using a Bruker Dautonics Autoflex MALDI-TOF mass spectrometer (Billerica, MA) following calibration with the standard. The mass list was generated by the SNAP peak detection algorithm using a signal-to-noise threshold of four following baseline correction of the spectra. Proteins were identified by searching the mass list against the National Center for Biotechnology Information (NCBI) annotation of the *P. furiosus* genome (NC\_003413) using Mascot's Peptide Mass Fingerprint tool (version 2.1, Matrix Science Ltd., Boston, MA). The searches were conducted using a peptide mass tolerance of 1.0, variable modifications of Carbamidomethylation (C) and Oxidation (M), and a maximum of one missed cleavage. Proteins with a  $p < 0.05$  (corresponding to a Mascot protein score of greater than 46) were considered significant.

### Author Contributions

Conceived and designed the experiments: JS RCH FEJ MWWA. Performed the experiments: JS RCH PM. Analyzed the data: JS RCH PM FEJ MWWA. Contributed reagents/materials/analysis tools: JS PM. Wrote the paper: JS RCH FEJ MWWA.

### References

- Armstrong FA, Belsey NA, Cracknell JA, Goldet G, Parkin A, et al. (2009) Dynamic electrochemical investigations of hydrogen oxidation and production by enzymes and implications for future technology. *Chem Soc Rev* 38: 36–51.
- Sigfusson TI (2007) Pathways to hydrogen as an energy carrier. *Philos Transact A Math Phys Eng Sci* 365: 1025–1042.
- Edwards PP, Kuznetsov VL, David WI (2007) Hydrogen energy. *Philos Transact A Math Phys Eng Sci* 365: 1043–1056.
- Vignais PM, Billoud B (2007) Occurrence, classification, and biological function of hydrogenases: an overview. *Chem Rev* 107: 4206–4272.
- Ogata H, Lubitz W, Higuchi Y (2009) [NiFe] hydrogenases: structural and spectroscopic studies of the reaction mechanism. *Dalton Trans* 37: 7577–7587.
- Vignais PM, Colbeau A (2004) Molecular biology of microbial hydrogenases. *Curr Issues Mol Biol* 6: 159–188.
- Fontecilla-Camps JC, Volbeda A, Cavazza C, Nicolet Y (2007) Structure/function relationships of [NiFe]- and [FeFe]-hydrogenases. *Chem Rev* 107: 4273–4303.
- Pierik AJ, Roseboom W, Happe RP, Bagley KA, Albracht SP (1999) Carbon monoxide and cyanide as intrinsic ligands to iron in the active site of [NiFe]-hydrogenases. NiFe(CN)<sub>2</sub>CO, Biology's way to activate H<sub>2</sub>. *J Biol Chem* 274: 3331–3337.
- Blokesch M, Paschos A, Theodoratou E, Bauer A, Hube M, et al. (2002) Metal insertion into NiFe-hydrogenases. *Biochem Soc Trans* 30: 674–680.
- Böck A, King PW, Blokesch M, Posewitz MC (2006) Maturation of hydrogenases. *Adv Microb Physiol* 51: 1–71.
- Bryant FO, Adams MW (1989) Characterization of hydrogenase from the hyperthermophilic archaeobacterium, *Pyrococcus furiosus*. *J Biol Chem* 264: 5070–5079.
- Rossmann R, Maier T, Lottspeich F, Böck A (1995) Characterisation of a protease from *Escherichia coli* involved in hydrogenase maturation. *Eur J Biochem* 227: 545–550.
- Posewitz MC, King PW, Smolinski SL, Smith RD, Ginley AR, et al. (2005) Identification of genes required for hydrogenase activity in *Chlamydomonas reinhardtii*. *Biochem Soc Trans* 33: 102–104.
- Fiala G, Stetter KO (1986) *Pyrococcus furiosus* sp. nov. represents a novel genus of marine heterotrophic archaeobacteria growing optimally at 100°C. *Arch Microbiol* 145: 56–61.
- Roussel M, Magro V, Forget N, Guigliarelli B, Belaich JP, et al. (1998) Heterologous expression of the *Desulfovibrio gigas* [NiFe] hydrogenase in *Desulfovibrio fructosovorans* MR400. *J Bacteriol* 180: 4982–4986.
- Bascones E, Imperial J, Ruiz-Argueso T, Palacios JM (2000) Generation of new hydrogen-recycling *Rhizobiacae* strains by introduction of a novel *hup* minitransposon. *Applied and Environmental Microbiology* 66: 4292–4299.
- Porthun A, Bernhard M, Friedrich B (2002) Expression of a functional NAD-reducing [NiFe] hydrogenase from the gram-positive *Rhodococcus opacus* in the gram-negative *Ralstonia eutropha*. *Arch Microbiol* 177: 159–166.
- Lenz O, Gleiche A, Strack A, Friedrich B (2005) Requirements for heterologous production of a complex metalloenzyme: the membrane-bound [NiFe] hydrogenase. *J Bacteriol* 187: 6590–6595.
- Kleihues L, Lenz O, Bernhard M, Buhre T, Friedrich B (2000) The H<sub>2</sub> sensor of *Ralstonia eutropha* is a member of the subclass of regulatory [NiFe] hydrogenases. *J Bacteriol* 182: 2716–2724.
- English CM, Eckert C, Brown K, Seibert M, King PW (2009) Recombinant and *in vitro* expression systems for hydrogenases: new frontiers in basic and applied studies for biological and synthetic H<sub>2</sub> production. *Dalton Trans*. pp 9970–9978.
- Shirshikova GN, Khusnutdinova AN, Postnikova OA, Patrusheva EV, Butanaev AM, et al. (2009) Expression of Ni-Fe hydrogenase structural genes derived from *Thiocapsa roseopersicina* in *Escherichia coli*. *Doklady Biochemistry and Biophysics* 425: 124–126.
- Ma K, Weiss R, Adams MW (2000) Characterization of hydrogenase II from the hyperthermophilic archaeon *Pyrococcus furiosus* and assessment of its role in sulfur reduction. *J Bacteriol* 182: 1864–1871.
- Schut GJ, Bridger SL, Adams MW (2007) Insights into the metabolism of elemental sulfur by the hyperthermophilic archaeon *Pyrococcus furiosus*: characterization of a coenzyme A- dependent NAD(P)H sulfur oxidoreductase. *J Bacteriol* 189: 4431–4441.
- Menon NK, Robbins J, Vartanian MD, Patil D, Peck HD, et al. (1993) Carboxy-Terminal Processing of the Large Subunit of [NiFe] Hydrogenases. *FEBS Letters* 331: 91–95.
- Horanyi P, Griffith J, Wang BC, Jenney FE (2006) Vectors and methods for high throughput co-expression. Patent Number 7,582,475 USA.
- Menon NK, Chatelus CY, Dervartanian M, Wendt JC, Shanmugam KT, et al. (1994) Cloning, sequencing, and mutational analysis of the *hyb* operon encoding *Escherichia coli* hydrogenase 2. *J Bacteriol* 176: 4416–4423.
- Menon NK, Robbins J, Wendt JC, Shanmugam KT, Przybyla AE (1991) Mutational analysis and characterization of the *Escherichia coli* *hya* operon, which encodes [NiFe] hydrogenase 1. *J Bacteriol* 173: 4851–4861.
- Sawers RG, Ballantine SP, Boxer DH (1985) Differential expression of hydrogenase isoenzymes in *Escherichia coli* K-12: evidence for a third isoenzyme. *J Bacteriol* 164: 1324–1331.
- Lutz S, Jacobi A, Schlenz V, Böhm R, Sawers G, et al. (1991) Molecular characterization of an operon (*hyb*) necessary for the activity of the three hydrogenase isoenzymes in *Escherichia coli*. *Mol Microbiol* 5: 123–135.
- Miller JH (1972) Experiments in Molecular Genetics. New York, USA: Cold Spring Harbor Laboratory Press. Vol. xvi, 466 p.
- Dougherty WG, Carrington JC, Cary SM, Parks TD (1988) Biochemical and mutational analysis of a plant virus polyprotein cleavage site. *EMBO J* 7: 1281–1287.
- Maeda T, Sanchez-Torres V, Wood TK (2007) *Escherichia coli* hydrogenase 3 is a reversible enzyme possessing hydrogen uptake and synthesis activities. *Appl Microbiol Biotechnol* 76: 1035–1042.

33. Qazi SN, Rees CE, Mellits KH, Hill PJ (2001) Development of *gfp* vectors for expression in *Listeria monocytogenes* and other low G+C Gram positive bacteria. *Microb Ecol* 41: 301–309.
34. Schneider K, Schlegel HG (1976) Purification and properties of soluble hydrogenase from *Alcaligenes eutrophus* H 16. *Biochim Biophys Acta* 452: 66–80.
35. Zhang YH, Evans BR, Mielenz JR, Hopkins RC, Adams MW (2007) High-yield hydrogen production from starch and water by a synthetic enzymatic pathway. *PLoS ONE* 2: e456.
36. Esper B, Badura A, Rogner M (2006) Photosynthesis as a power supply for (bio-)hydrogen production. *Trends Plant Sci* 11: 543–549.
37. Prince RC, Kheshgi HS (2005) The photobiological production of hydrogen: potential efficiency and effectiveness as a renewable fuel. *Crit Rev Microbiol* 31: 19–31.
38. Jenney FE, Jr., Adams MW (2008) The impact of extremophiles on structural genomics (and vice versa). *Extremophiles* 12: 39–50.
39. Mertens R, Greiner L, van den Ban ECD, Haaker HBCM, Liese A (2003) Practical applications of hydrogenase I from *Pyrococcus furiosus* for NADPH generation and regeneration. *Journal of Molecular Catalysis B-Enzymatic* 24–5: 39–52.
40. Sambrook J, Russell DW (2001) *Molecular Cloning: A Laboratory Manual*. New York, USA: Cold Spring Harbor Laboratory Press. 2100 p.
41. Ma K, Adams MW (2001) Hydrogenases I and II from *Pyrococcus furiosus*. *Methods Enzymol* 331: 208–216.
42. Oxer MD, Bentley CM, Doyle JG, Peakman TC, Charles IG, et al. (1991) High-level heterologous expression in *Escherichia coli* using the anaerobically-activated *Nirb* promoter. *Nucleic Acids Research* 19: 2889–2892.
43. King PW, Przybyla AE (1999) Response of *hya* expression to external pH in *Escherichia coli*. *Journal of Bacteriology* 181: 5250–5256.
44. Schenk PM, Baumann S, Mattes R, Steinbiss HH (1995) Improved high-level expression system for eukaryotic genes in *Escherichia coli* using T7 RNA polymerase and rare ArgtRNAs. *Biotechniques* 19: 196–198, 200.
